# Supplementary material
Source: publisher figshare collection journal article supplement (https://sage.figshare.com/ndownloader/files/18044426)
Supplement: Supplementary file 1 [file 18044426]

## Appendix A

### *List of intervention studies included and excluded in the meta-analysis.*

| Review Article                 | Evaluation Study                        | Inclusion |                                                                                                                     |
|--------------------------------|-----------------------------------------|-----------|---------------------------------------------------------------------------------------------------------------------|
| Graham-Bermann (2000)          | Cox (1995)                              | No        | No use of a standardized instrument (anecdotal evidence)                                                            |
|                                | Frey-Angel (1989)                       | No        | Not a quantitative evaluation study (clinical case examples)                                                        |
|                                | Graham-Bermann (1998)                   | No        | Data could not be used (summary of findings)                                                                        |
|                                | Hughes & Barad (1983) <sup>a</sup>      | No        | No pre- and post-intervention data for child/adolescent outcomes                                                    |
|                                | Jaffe et al. (1986) <sup>a</sup>        | No        | Data could not be used (percentages and no additional data available, based on author response)                     |
|                                | Jaffe et al. (1988)                     | No        | Data could not be used (percentages and no additional data available, based on author response)                     |
|                                | Jouriles et al. (1998) <sup>b</sup>     | No        | Intervention did not include children/adolescents (mother victims)                                                  |
|                                | Peled & Edleson (1992) <sup>a</sup>     | No        | Not a quantitative evaluation study (qualitative data)                                                              |
|                                | Peled et al. (1995) <sup>a</sup>        | No        | Not a quantitative evaluation study (qualitative data)                                                              |
|                                | Ragg et al. (1998) <sup>a</sup>         | No        | Could not be located (conference presentation)                                                                      |
|                                | Sullivan & Davidson (1998) <sup>c</sup> | No        | Could not be located (report)                                                                                       |
|                                | Tutty & Wagar (1994)                    | No        | Not a quantitative evaluation study (no outcome data presented)                                                     |
| Graham-Bermann & Hughes (2003) | Wagar & Rodway (1995) <sup>d</sup>      | No        | No use of a standardized instrument or outcome relevant for meta-analysis (child witness to violence questionnaire) |
|                                | Wilson et al. (1989)                    | No        | Data could not be used (percentages within a conceptual paper so no data available, based on co-author response)    |
|                                | Graham-Bermann (2000) <sup>e</sup>      | No        | Duplicate                                                                                                           |
|                                | Jouriles et al. (2001) <sup>f</sup>     | No        | Intervention did not include children/adolescents (mother victims)                                                  |
|                                | Sullivan & Davidson (1998) <sup>c</sup> | No        | Duplicate                                                                                                           |
| Cohen et al. (2006)            | Sullivan et al. (2002) <sup>g</sup>     | No        | No use of a standardized instrument or outcome relevant for meta-analysis (child self-competence)                   |
|                                | Lieberman et al. (2005) <sup>h</sup>    | Yes       |                                                                                                                     |
|                                | Lieberman et al. (2006) <sup>i</sup>    | Yes       |                                                                                                                     |

|                              |                                             |     |                                                                                                                                      |
|------------------------------|---------------------------------------------|-----|--------------------------------------------------------------------------------------------------------------------------------------|
|                              | Jouriles et al. (1998) <sup>b</sup>         | No  | Duplicate                                                                                                                            |
|                              | Jouriles et al. (2001) <sup>f</sup>         | No  | Duplicate                                                                                                                            |
|                              | Wolfe et al. (1997)                         | No  | Data could not be used (summary of findings in a book)                                                                               |
|                              | Graham-Bermann (2000) <sup>e</sup>          | No  | Duplicate                                                                                                                            |
| Rivett et al. (2006)         | Ducharme et al. (2000) <sup>j</sup>         | No  | Intervention did not include children/adolescents (mother victims)                                                                   |
|                              | Graham-Bermann & Levendosky (1998)          | No  | Not a quantitative evaluation study (no outcome data presented)                                                                      |
|                              | Hughes & Barad, (1983) <sup>a</sup>         | No  | Duplicate                                                                                                                            |
|                              | Jaffe et al. (1986) <sup>a</sup>            | No  | Duplicate                                                                                                                            |
|                              | Jouriles et al. (1998) <sup>b</sup>         | No  | Duplicate                                                                                                                            |
|                              | Jouriles et al. (2001) <sup>f</sup>         | No  | Duplicate                                                                                                                            |
|                              | MacMillan & Harpur (2003) <sup>k</sup>      | Yes |                                                                                                                                      |
|                              | Rabenstein & Lehmann (2000)                 | No  | Not a quantitative evaluation study (no outcome data presented)                                                                      |
|                              | Ragg et al. (1998) <sup>a</sup>             | No  | Duplicate                                                                                                                            |
|                              | Peled & Edleson (1992) <sup>a</sup>         | No  | Duplicate                                                                                                                            |
|                              | Peled et al. (1995) <sup>a</sup>            | No  | Duplicate                                                                                                                            |
|                              | Pepler et al. (2000) <sup>k</sup>           | Yes |                                                                                                                                      |
|                              | Sudermann et al. (2000) <sup>k</sup>        | No  | Not a quantitative evaluation study (qualitative data)                                                                               |
|                              | Sullivan & Davidson (1998) <sup>c</sup>     | No  | Duplicate                                                                                                                            |
|                              | Wagar & Rodway (1995) <sup>c</sup>          | No  | Duplicate                                                                                                                            |
| Vickerman & Margolin, (2007) | Cohen et al. (2004) <sup>l</sup>            | No  | Data could not be used (sample experienced multiple victimization and IPV-specific data are not available, based on author response) |
|                              | Graham-Bermann & Hughes (2003) <sup>s</sup> | No  | Duplicate                                                                                                                            |
|                              | Graham-Bermann et al. (2007) <sup>m</sup>   | Yes |                                                                                                                                      |
|                              | Jouriles et al. (2001) <sup>f</sup>         | No  | Duplicate                                                                                                                            |
|                              | Lieberman et al. (2005) <sup>h</sup>        | No  | Duplicate                                                                                                                            |
|                              | Lieberman et al. (2006) <sup>i</sup>        | No  | Duplicate                                                                                                                            |
|                              | McDonald et al. (2006) <sup>n</sup>         | No  | Intervention did not include children/adolescents (mother victims)                                                                   |
|                              | Sullivan et al. (1994)                      | No  | No pre- and post-intervention data for child/adolescent outcomes (mother outcome data only)                                          |

|                      |                                           |     |                                                                                                                                  |
|----------------------|-------------------------------------------|-----|----------------------------------------------------------------------------------------------------------------------------------|
|                      | Sullivan et al. (2002) <sup>g</sup>       | No  | Duplicate                                                                                                                        |
|                      | Wolfe et al. (2003)                       | No  | Data could not be used (sample experienced multiple victimization and IPV-specific data not available, based on author response) |
| Stover et al. (2009) | Cohen et al. (2004) <sup>l</sup>          | No  | Duplicate                                                                                                                        |
|                      | Lieberman et al. (2005) <sup>h</sup>      | No  | Duplicate                                                                                                                        |
|                      | Lieberman et al. (2006) <sup>i</sup>      | No  | Duplicate                                                                                                                        |
|                      | Graham-Bermann et al. (2007) <sup>m</sup> | No  | Duplicate                                                                                                                        |
| Rizo et al. (2011)   | Becker et al. (2008)                      | Yes |                                                                                                                                  |
|                      | Blodgett et al. (2008)                    | No  | Data could not be used (effect sizes could not be calculated, and no author response to request for additional information)      |
|                      | Carter et al. (2003) <sup>v</sup>         | Yes |                                                                                                                                  |
|                      | Crusto et al. (2008) <sup>n</sup>         | Yes |                                                                                                                                  |
|                      | Dodd (2009) <sup>o</sup>                  | No  | Data could not be used (effect sizes could not be calculated, and author contact information not available for follow-up)        |
|                      | Ducharme et al. (2000) <sup>j</sup>       | No  | Duplicate                                                                                                                        |
|                      | Ernst et al. (2008)                       | No  | Data could not be used (effect sizes could not be calculated, and no author response to request for additional information)      |
|                      | Gibson & Gutierrez (1991) <sup>o</sup>    | No  | Data could not be used for a meta-analysis (descriptive data and additional data not available, based on co-author response)     |
|                      | Graham-Bermann et al. (2007) <sup>m</sup> | No  | Duplicate                                                                                                                        |
|                      | Johnston (2003)                           | Yes |                                                                                                                                  |
|                      | Jouriles et al. (2001) <sup>f</sup>       | No  | Duplicate                                                                                                                        |
|                      | Jouriles et al. (2009) <sup>l</sup>       | No  | Intervention did not include children/adolescents (mother victims)                                                               |
|                      | Lieberman et al. (2005) <sup>h</sup>      | No  | Duplicate                                                                                                                        |
|                      | Lieberman et al. (2006) <sup>i</sup>      | No  | Duplicate                                                                                                                        |
|                      | Kot et al. (1998) <sup>n</sup>            | Yes |                                                                                                                                  |
|                      | Marshall et al. (1995)                    | No  | No use of a standardized instrument or outcome relevant for meta-analysis (victimization questionnaire)                          |
|                      | MacMillan & Harpur (2003) <sup>k</sup>    | No  | Duplicate                                                                                                                        |
|                      | McDonald et al. (2006) <sup>n</sup>       | No  | Duplicate                                                                                                                        |

|                       |                                         |     |                                                                                                                                                   |
|-----------------------|-----------------------------------------|-----|---------------------------------------------------------------------------------------------------------------------------------------------------|
|                       | McFarlane et al. (2005a) <sup>n</sup>   | No  | Intervention did not include children/adolescents (mother victims)                                                                                |
|                       | McFarlane et al. (2005b)                | No  | Intervention did not include children/adolescents (mother victims)                                                                                |
|                       | McWhirther (2008)                       | No  | No use of a standardized instrument or outcome relevant for meta-analysis (emotional barometer)                                                   |
|                       | Peled et al. (2010) <sup>o</sup>        | No  | Intervention did not include children/adolescents (mother victims)                                                                                |
|                       | Pepler et al. (2000) <sup>k</sup>       | No  | Duplicate                                                                                                                                         |
|                       | Smith & Landreth (2003) <sup>p</sup>    | Yes |                                                                                                                                                   |
|                       | Suderman et al. (2000) <sup>k</sup>     | No  | Duplicate                                                                                                                                         |
|                       | Sullivan et al. (2002) <sup>g</sup>     | No  | Duplicate                                                                                                                                         |
|                       | Sullivan et al. (2004) <sup>p</sup>     | Yes |                                                                                                                                                   |
|                       | Timmer et al. (2010) <sup>o</sup>       | Yes |                                                                                                                                                   |
| Gillies et al. (2012) | Tyndall-Lind et al. (2001) <sup>n</sup> | Yes |                                                                                                                                                   |
|                       | Wagar & Rodway (1995) <sup>c</sup>      | No  | Duplicate                                                                                                                                         |
|                       | Cohen et al. (2004) <sup>l</sup>        | No  | Duplicate                                                                                                                                         |
|                       | Cohen et al. (2011) <sup>q</sup>        | Yes |                                                                                                                                                   |
| Hackett et al. (2016) | Crusto et al. (2008) <sup>l</sup>       | No  | Duplicate                                                                                                                                         |
|                       | Graham-Bermann et al. (2011a,b)         | No  | Data could not be used because they were the same as reported in Graham-Bermann et al. (2007)                                                     |
|                       | Gwynne et al., (2009)                   | No  | Data could not be used (analyses not conducted separately for IPV-exposed children, and no author response to request for additional information) |
|                       | Jouriles et al. (2009) <sup>l</sup>     | No  | Duplicate                                                                                                                                         |
|                       | Kot et al. (1998) <sup>n</sup>          | No  | Duplicate                                                                                                                                         |
|                       | Lieberman et al. (2005) <sup>h</sup>    | No  | Duplicate                                                                                                                                         |
|                       | McDonald et al. (2006) <sup>n</sup>     | No  | Duplicate                                                                                                                                         |
|                       | McFarlane et al. (2005a) <sup>n</sup>   | No  | Duplicate                                                                                                                                         |
|                       | McWhirter (2006)                        | No  | Intervention did not include children/adolescents (mother victims)                                                                                |
|                       | McWhirter (2011) <sup>r</sup>           | No  | Intervention did not include children/adolescents (mother victims)                                                                                |
|                       | Shultz et al. (2007)                    | Yes |                                                                                                                                                   |
|                       | Smith & Landreth (2003) <sup>p</sup>    | No  | Duplicate                                                                                                                                         |
|                       | Sullivan et al. (2004) <sup>p</sup>     | No  | Duplicate                                                                                                                                         |

|                       |                                         |     |                                                                    |
|-----------------------|-----------------------------------------|-----|--------------------------------------------------------------------|
|                       | Tyndall-Lind et al. (2001) <sup>n</sup> | No  | Duplicate                                                          |
| Gillies et al. (2016) | Cohen et al. (2011) <sup>u</sup>        | No  | Duplicate                                                          |
|                       | Lieberman et al. (2005) <sup>h</sup>    | No  | Duplicate                                                          |
|                       | Overbeek et al. (2013)                  | Yes |                                                                    |
| Austin et al. (2017)  | Basu et al. (2009)                      | Yes |                                                                    |
|                       | Dodd (2009) <sup>o</sup>                | No  | Duplicate                                                          |
|                       | Ducharme et al. (2000) <sup>j</sup>     | No  | Duplicate                                                          |
|                       | Gibson & Gutierrez (1991) <sup>o</sup>  | No  | Duplicate                                                          |
|                       | Graham-Bermann & Miller (2013)          | No  | Intervention did not include children/adolescents (mother victims) |
|                       | Graham-Bermann et al. (2015)            | No  | Intervention did not include children/adolescents (mother victims) |
|                       | Grip et al. (2011)                      | Yes |                                                                    |
|                       | Howell et al. (2014)                    | No  | Intervention did not include children/adolescents (mother victims) |
|                       | Jouriles et al. (2001) <sup>f</sup>     | No  | Duplicate                                                          |
|                       | Jouriles et al. (2009) <sup>l</sup>     | No  | Duplicate                                                          |
|                       | Kearney & Cushing (2012)                | No  | Intervention did not include children/adolescents (mother victims) |
|                       | Lavi et al. (2015)                      | No  | No pre- and post-intervention data for child/adolescent outcomes   |
|                       | Lieberman et al. (2005) <sup>h</sup>    | No  | Duplicate                                                          |
|                       | Lieberman et al. (2006) <sup>i</sup>    | No  | Duplicate                                                          |
|                       | Keeshin et al. (2015)                   | No  | No pre- and post-intervention data for child/adolescent outcomes   |
|                       | McDonald et al. (2006) <sup>n</sup>     | No  | Duplicate                                                          |
|                       | McWhirter (2011) <sup>r</sup>           | No  | Duplicate                                                          |
|                       | Peled et al. (2010) <sup>o</sup>        | No  | Duplicate                                                          |
|                       | Prosman et al. (2014)                   | No  | Intervention did not include children/adolescents (mother victims) |
|                       | Smith et al. (2015)                     | Yes |                                                                    |
|                       | Smith & Landreth (2003) <sup>p</sup>    | No  | Duplicate                                                          |
|                       | Sullivan et al. (2002) <sup>g</sup>     | No  | Duplicate                                                          |
|                       | Sullivan et al. (2004) <sup>p</sup>     | No  | Duplicate                                                          |
|                       | Timmer et al. (2010) <sup>o</sup>       | No  | Duplicate                                                          |
|                       | Vergara et al. (2015)                   | No  | Intervention did not include children/adolescents (mother victims) |

|                          |                                              |     |                                                                                                               |
|--------------------------|----------------------------------------------|-----|---------------------------------------------------------------------------------------------------------------|
|                          | Waldman-Levi & Weintraub (2015) <sup>t</sup> | No  | No use of a standardized instrument or outcome relevant for meta-analysis (coding of videotaped interactions) |
| Anderson & van Ee (2018) | Basu et al. (2009) <sup>t</sup>              | No  | Duplicate                                                                                                     |
|                          | Becker et al. (2008) <sup>p</sup>            | No  | Duplicate                                                                                                     |
|                          | Carter et al. (2003) <sup>v</sup>            | No  | Duplicate                                                                                                     |
|                          | Cohen et al. (2011) <sup>u</sup>             | No  | Duplicate                                                                                                     |
|                          | Graham-Bermann et al. (2007) <sup>m</sup>    | No  | Duplicate                                                                                                     |
|                          | Graham-Bermann & Miller (2013) <sup>t</sup>  | No  | Duplicate                                                                                                     |
|                          | Graham-Bermann et al. (2015)                 | Yes |                                                                                                               |
|                          | Jouriles et al. (2001) <sup>f</sup>          | No  | Duplicate                                                                                                     |
|                          | Jouriles et al. (2009) <sup>l</sup>          | No  | Duplicate                                                                                                     |
|                          | Lieberman et al. (2005) <sup>h</sup>         | No  | Duplicate                                                                                                     |
|                          | Lieberman et al. (2006) <sup>i</sup>         | No  | Duplicate                                                                                                     |
|                          | Macmillan & Harpur (2003) <sup>k</sup>       | No  | Duplicate                                                                                                     |
|                          | McDonald et al. (2006) <sup>n</sup>          | No  | Duplicate                                                                                                     |
|                          | McWhirter (2011) <sup>r</sup>                | No  | Duplicate                                                                                                     |
|                          | Smith & Landreth (2003) <sup>p</sup>         | No  | Duplicate                                                                                                     |
|                          | Smith (2016)                                 | No  | Data could not be used because they were the same as in Smith et al. (2015)                                   |
|                          | Sullivan et al. (2004) <sup>p</sup>          | No  | Duplicate                                                                                                     |
|                          | Waldman Levi & Weintraub (2015) <sup>t</sup> | No  | Duplicate                                                                                                     |

Note. References for excluded studies may be found in the review articles in which they were included.

<sup>a</sup>Also identified by Graham-Bermann & Hughes (2003) and Rivett et al. (2006); <sup>b</sup>Also identified by Graham-Bermann & Hughes (2003), Cohen et al. (2006), and Rivett et al. (2006); <sup>c</sup>Also identified by Graham-Bermann (2000), Graham-Brennan & Hughes (2003), and Rivett et al. (2006); <sup>d</sup>Also identified by Graham-Bermann (2000), Rivett et al. (2006), and Rizo et al. (2011); <sup>e</sup>Also identified by Graham-Bermann & Hughes (2003) and Cohen et al. (2006); <sup>f</sup>Also identified by Graham-Bermann & Hughes (2003), Cohen et al. (2006), Rivett et al. (2006), Vickerman et al. (2007), Rizo et al. (2011), Austin et al. (2017), and Anderson & van Ee (2018); <sup>g</sup>Also identified by Graham-Bermann & Hughes (2003), Vickerman et al. (2007), Rizo et al. (2011), and Austin et al. (2017); <sup>h</sup>Also identified by Graham-Bermann & Hughes (2003), Vickerman et al. (2007), Stover et al. (2009), Rizo et al. (2011), Hackett et

al. (2016), Gilles et al. (2016), Austin et al. (2017), and Anderson & van Ee (2018); <sup>i</sup>Also identified by Graham- Bermann & Hughes (2003), Vickerman et al. (2007), Stover et al. (2009), Rizo et al. (2011), Hackett et al. (2016), Austin et al. (2017). and Anderson & van Ee (2018); <sup>j</sup>Also identified by Rivett et al. (2006), Rizo et al. (2011), and Austin et al. (2017); <sup>k</sup>Also identified by Rivett et al. (2006), Rizo et al. (2011), and Anderson & van Ee (2018); <sup>l</sup>Also identified by Vickerman et al. (2007), Stover et al. (2009), Gilles et al. (2012), and Anderson & van Ee (2018); <sup>m</sup>Also identified by Vickerman et al. (2007), Stover et al. (2009), Rizo et al. (2011), and Anderson & van Ee (2018); <sup>n</sup>Also identified by Rizo et al. (2011), Hackett et al. (2016), and Anderson & van Ee (2018); <sup>o</sup>Also identified by Rizo et al. (2011) and Austin et al. (2017); <sup>p</sup>Also identified by Rizo et al. (2011), Hackett et al. (2016), Austin et al. (2017), and Anderson & van Ee (2018); <sup>q</sup>Also identified by Gilles et al. (2012) and Gilles et al. (2016); <sup>r</sup>Also identified by Hackett et al. (2016), Austin et al. (2017), and Anderson & van Ee (2018); <sup>s</sup>Also identified by Graham-Bermann & Hughes (2003); <sup>t</sup>Also identified by Austin et al. (2017) and Anderson & van Ee (2018); <sup>u</sup>Also identified by Gilles et al. (2016) and Anderson & van Ee (2018); <sup>v</sup>Also identified by Rizo et al. (2011) and Anderson & van Ee (2018).
